# Supplementary material
Source: Springer Nature journal article supplement (https://www.springermedizin.de/resource/supplementary/12891_2010_976_MOESM5_ESM.pdf/9506840)

**A**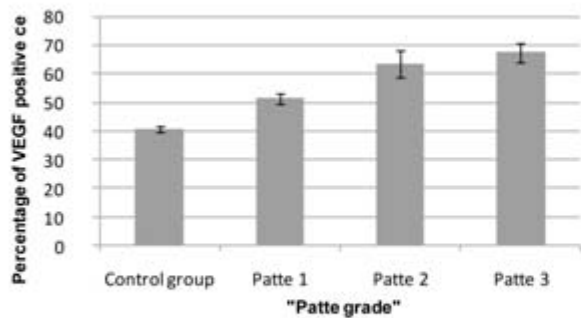**B**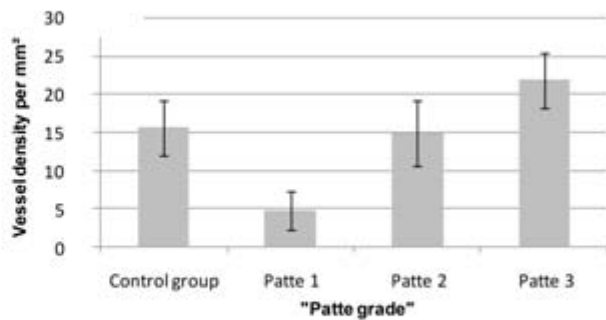**C**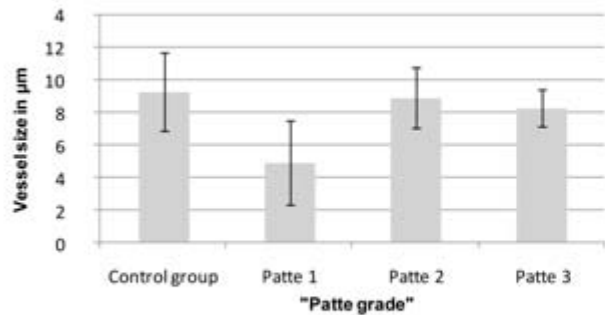**D**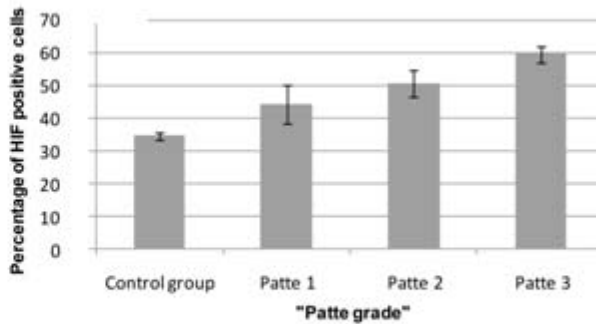

Supplement: MOESM5 [file 9506840]
